# Supplementary material for: Comprehensive determination of transcription start sites derived from all RNA polymerases using ReCappable-seq
Source: Genome Res. 2022 Jan;32(1):162–74. doi: 10.1101/gr.275784.121 (PMC8744680; doi:10.1101/gr.275784.121)
Supplement: Supplemental Material [file supp_gr.275784.121_Supplemental_Tables_nov_16.xlsx]

## Sheet: Supplementary_Table_S1
Supplemental Table S1 : Alignment summary
Method	Source	Replicate	RNA Sample	NCBI accession number	Total Reads after trimming adapter	% reads mapped by STAR	% reads uniquely mapped by STAR	% reads mapped by bowtie2	% rRNA
ReCappable-seq	This study: TSS	1	A549	GSE132660: GSM3885086	55434928	0.907347	0.6764	0.9335	0.029065
ReCappable-seq	This study: TSS	2	A549	GSE132660: GSM3885087	55507309	0.869758	0.6347	0.9419	0.0334396
ReCappable-seq Control	This study: TSS	1	A549	GSE132660: GSM3885088	84053402	0.980038	0.1438	0.9572	0.696954
ReCappable-seq Control	This study: TSS	2	A549	GSE132660: GSM3885089	59917924	0.976615	0.1074	0.9484	0.66332
CIP ReCappable-seq	This study: TSS	1	A549	GSE132660: GSM3885082	59644324	0.959725	0.755	0.8919	0.0219429
CIP ReCappable-seq	This study: TSS	2	A549	GSE132660: GSM3885083	20169567	0.955624	0.745	0.8922	0.0208086
CIP ReCappable-seq Control	This study: TSS	1	A549	GSE132660: GSM3885084	26121572	0.979	0.0925	NA	0.745121
CIP ReCappable-seq Control	This study: TSS	2	A549	GSE132660: GSM3885085	31923196	0.9756	0.0826	NA	0.743273
ReCappable-seq	This study: TSS	1	Brain total RNA	GSE132660: GSM4467058	32664531	0.954036	0.8178	NA	0.0459518
ReCappable-seq	This study: TSS	2	Brain total RNA	GSE132660: GSM4467059	32662803	0.954033	0.8178	NA	0.0431693
CAGE	This study: TSS	1	A549	GSE132660: GSM3885090	29777828	0.9888	0.588	0.9409	0.346343
CAGE	This study: TSS	2	A549	GSE132660: GSM3885091	34339652	0.9888	0.5924	0.9393	0.341324
CAGE	PMID 29867192	1	K562	GSE103486: SRR6006235	8273069	NA	NA	NA	0.102794
CAGE	PMID 29867192	4	K562	GSE103486: SRR6006236	8039860	NA	NA	NA	0.150252
CAGE	PMID 29867192	6	K562	GSE103486: SRR6006237	7781269	NA	NA	NA	0.104561
CAGE	PMID 29867192	merged 1+4+6	K562		24094198	NA	NA	0.8883	NA
RNA-seq total RNA	This study: RNA-seq	1	A549	GSE132660: GSM4467060	6420055	0.9761	0.1365	NA	NA
RNA-seq rRNA-del	This study: RNA-seq del	1	A549	GSE132660: GSM4467061	7869338	0.9775	0.8249	NA	NA
RNA-seq rRNA-del	PMID 29867192	1	K652	GSE103486: SRR6006231	5089363	0.9855	0.8102	NA	NA

## Sheet: Supplementary_Table_S2
Supplemental Table S2 : Primer sequences used in this study
RACE targets	forward primer	reverse primer	ligation RNA oligonucleotide
RPPH1	AATGATACGGCGACCACCGAGATCTACACGTTCAGAGTTCTACAGTCCGA	CGGCATCTCCTGCCCAGT	GUUCAGAGUUCUACAGUCCGACGAUC
RMRP	"	CTTGGCGGACTTTGGAGTGGGA	"
RNA7SL1	"	CCATATTGATGCCGAACTTAGTGCGGACACCCGATCGGCATAGCGCACTACA	"
RNU6-1	"	GTGACTGGAGTTCAGACGTGTGCTCTTCCGATCTAAATATGGAACGCTTCACGAATTTGC	"
QPCR targets
RNA18S1	GTTCAGCCACCCGAGATTGA	CCCATCACGAATGGGGTTCA
ACTB	CTCACCATGGATGATGATATCGC	AGGAATCCTTCTGACCCATGC
RPL19	CGAGCGAGCTCTTTCCTTTC	GGAGTTGGCATTGGCGATTT
MALAT1	GGAGCTTGAGGAAACCGCA	AGCTTCATCTCAACCTCCGT
FKBP5	CGGCGACAGGTTCTCTACTT	ATCGGCGTTTCCTCACCATT
TMSB10	GAGTGGGAGCACCAGGATCT	CCATGTCTGGTTTGTCTGCC
HIST1H3H	CTCTGAAGGCATGGCGCGTA	ATGGGGCTTCTTGACACCG
HIST1H3B	CAGGCAAGCTTTTCTGTGGTT	GCTTTACCGCCGGTGGAT
RMRP	TTCGTGCTGAAGGCCTGTATCCT	CTTGGCGGACTTTGGAGTGGGA
RPPH1	ACGAGCTGAGTGCGTCCTGT	CGGCATCTCCTGCCCAGTC
RNA7SK	TCCCCTGCTAGAACCTCCAA	ACATGCAGCGCCTCATTTG
ERCC_130	CCAGCGTCACACAAAAACGG	AGTGCCTTCAGCTCTTCTACC
FLuc	CCATCACCATCACCACGGAT	CACCTCGATATGTGCATCTGT
locus 1	TGCATGAGTTAGCCTTTTATGCAT	TGCATGAGTTAGCCTTTTATGCAT
locus 2	TTATCAAAGTGGTTTACTGTAAGGCTGA	GGTTTCCACGTTTGGAAAAATAAG
locus 3	GGTCAGGGGGCAGATAAATGAAA	GCCATCTGCCATGAGTTATAGAAAAG
